# Supplementary material
Source: ML conference proceedings conference paper supplement (https://proceedings.neurips.cc/paper_files/paper/2023/hash/44cdeb5ab7da31d9b5cd88fd44e3da84-Abstract.html)
Supplement: Supplementary file 1 [file 44cdeb5ab7da31d9b5cd88fd44e3da84-Supplemental-Conference.pdf]

## Different Target Models

Table 4: ViT-b16, 50 runs

|                                | EAC           | DeepLIFT | GradSHAP | IntGrad | KernelSHAP | FeatAbl | LIME   |
|--------------------------------|---------------|----------|----------|---------|------------|---------|--------|
| ImageNet/Insertion $\uparrow$  | <b>89.594</b> | 54.455   | 68.125   | 69.480  | 75.152     | 65.656  | 76.161 |
| CoCo/Insertion $\uparrow$      | <b>76.759</b> | 37.659   | 48.888   | 50.323  | 63.503     | 59.072  | 64.244 |
| ImageNet/Deletion $\downarrow$ | <b>17.298</b> | 40.784   | 30.948   | 29.903  | 21.825     | 34.191  | 19.254 |
| CoCo/Deletion $\downarrow$     | <b>8.318</b>  | 28.762   | 18.422   | 17.440  | 9.950      | 15.946  | 8.426  |

Table 5: MobileNet-v2, 50 runs

|                                | EAC           | DeepLIFT | GradSHAP | IntGrad | KernelSHAP | FeatAbl | LIME   |
|--------------------------------|---------------|----------|----------|---------|------------|---------|--------|
| ImageNet/Insertion $\uparrow$  | <b>74.651</b> | 34.197   | 47.848   | 48.662  | 60.837     | 59.197  | 61.282 |
| CoCo/Insertion $\uparrow$      | <b>68.556</b> | 28.951   | 37.393   | 37.719  | 48.658     | 44.420  | 50.387 |
| ImageNet/Deletion $\downarrow$ | <b>6.002</b>  | 26.381   | 14.679   | 13.382  | 7.766      | 8.866   | 7.344  |
| CoCo/Deletion $\downarrow$     | <b>6.684</b>  | 21.467   | 14.237   | 14.936  | 9.308      | 11.706  | 7.106  |

Table 6: ResNet-18, 50 runs

|                                | EAC           | DeepLIFT | GradSHAP | IntGrad | KernelSHAP | FeatAbl | LIME   |
|--------------------------------|---------------|----------|----------|---------|------------|---------|--------|
| ImageNet/Insertion $\uparrow$  | <b>73.558</b> | 47.799   | 38.877   | 36.806  | 50.547     | 43.448  | 50.592 |
| CoCo/Insertion $\uparrow$      | <b>65.669</b> | 50.689   | 42.937   | 45.252  | 54.046     | 53.835  | 53.837 |
| ImageNet/Deletion $\downarrow$ | <b>6.596</b>  | 8.588    | 11.273   | 11.555  | 6.638      | 8.352   | 6.776  |
| CoCo/Deletion $\downarrow$     | <b>5.015</b>  | 9.097    | 11.758   | 11.483  | 7.007      | 9.325   | 6.495  |

We explore the performance of EAC on different target models. We choose three representative visual models, including ViT [48], MobileNet [49], and ResNet-18 [1], and use the same experimental setup as in the main text. We run each method for 50 times to report the average performance of each method. Overall, we observe a similar performance as shown in the main text. In particular, EAC consistently outperforms other methods on all target models.

## Backdoor Defense

Table 7: Backdoor-Defense on CIFAR-10

| ASR                        | Victim Model | EAC          | DeepLIFT | GradSHAP | IntGrad | KernelSHAP | FeatAbl | LIME  |
|----------------------------|--------------|--------------|----------|----------|---------|------------|---------|-------|
| BadNet [50] $\downarrow$   | 0.99         | <b>0.042</b> | 0.542    | 0.622    | 0.618   | 0.91       | 0.47    | 0.574 |
| TrojanNN [51] $\downarrow$ | 0.99         | <b>0.038</b> | 0.094    | 0.122    | 0.122   | 0.65       | 0.098   | 0.11  |

To evaluate the security impact of EAC, this section conducts backdoor removal experiments on CIFAR-10 [52]. We compare EAC and other XAI methods. Specifically, we perform two representative backdoor attacks, BadNet [50] and TrojanNN [51], on ResNet-18 as the target model. During the evaluation process, aligned with relevant works in this field [53], we remove the top three patches among every poisoned image for each XAI tool, and record the corresponding Attack Success Rate (ASR) after the removal. Overall, we randomly generate 250 poisoned images, and report their average ASR in Table 7. The evaluation results are highly encouraging; EAC has the lowest ASR under both attack settings. We interpret that this evaluation shows the high generalizability of EAC over different target models.

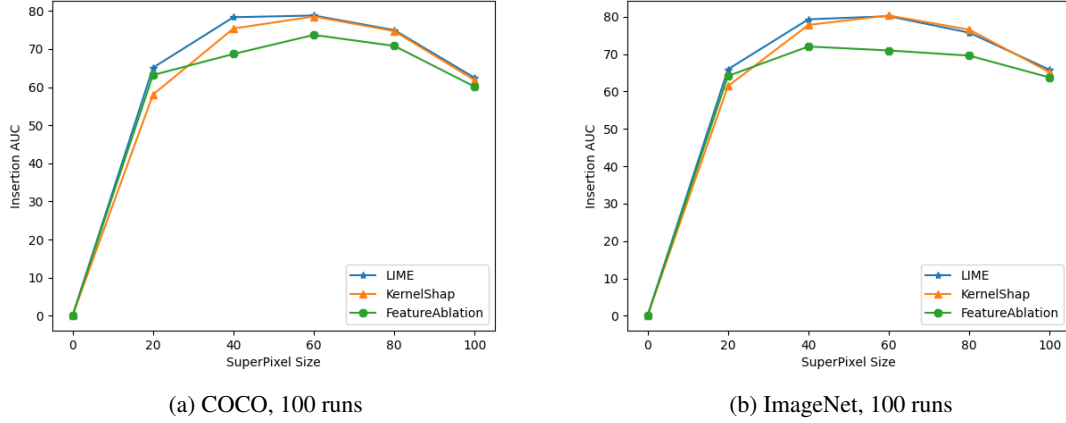

Figure 3: The effect of the superpixel size on AUC. A trade-off can be observed.

### Analysis of the Trade-off between SuperPixel Size and AUC

Overall, superpixel-based XAI tools are sensitive to the size of the superpixel. To obtain a fair comparison between EAC and de facto superpixel-based XAI tools, we carefully studied how the size of superpixel influence the performance of LIME, KernelShap, and FeatureAblation. The evaluation results using both ImageNet and COCO are shown in Fig. 3. We observed that there exists a trade-off between AUC and the superpixel size for both datasets. Empirical observation shows that a proper range of the superpixel size ranges from 40 to 80.

To unleash the full capability of superpixel-based methods, we set the superpixel size as 75 for ImageNet evaluations, and 58 for COCO evaluations, respectively, when conducting the experiments in the main paper. In contrast, EAC does *not* require such a hyperparameter tuning step, and is able to achieve superior performance over those superpixel-based methods.
